# Supplementary material for: Endogenous Semaphorin-7A Impedes Human Lung Fibroblast Differentiation
Source: PubMed Central journal article supplement (PMC5240965; doi:10.1371/journal.pone.0170207), 2017-01-17

**Figure S2**

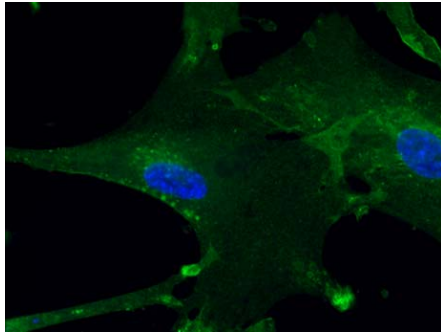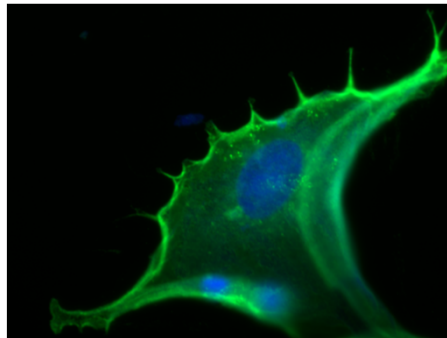

Supplement: pone.0170207.s002.pdf [file pone.0170207.s002.pdf]
